# Supplementary material for: A Tool That Assesses the Evidence, Transparency, and Usability of Online Health Information: Development and Reliability Assessment
Source: PubMed Central journal article supplement (PMC6715399; doi:10.2196/aging.9216), 2018-05-07
Supplement: aging_v1i1e3_app2.pdf [file aging_v1i1e3_app2.pdf]

## Multimedia Appendix 2: The Web Resource Rating (WRR) Tool

| <b>Web Resource Rating (WRR) tool</b>                                                                                                                                                                                                                                                                                                                                                                                                                                                           |                 |               |
|-------------------------------------------------------------------------------------------------------------------------------------------------------------------------------------------------------------------------------------------------------------------------------------------------------------------------------------------------------------------------------------------------------------------------------------------------------------------------------------------------|-----------------|---------------|
| <p><i>Intended for quality assessment of online web resources which are:</i></p> <ul style="list-style-type: none"> <li>• <i>Not directly funded by a company trying to sell a product or service</i></li> <li>• <i>Less than five years old</i></li> </ul>                                                                                                                                                                                                                                     |                 |               |
| <b>Criteria</b>                                                                                                                                                                                                                                                                                                                                                                                                                                                                                 | <b>Yes (1*)</b> | <b>No (0)</b> |
| <b>Evidence Base</b>                                                                                                                                                                                                                                                                                                                                                                                                                                                                            |                 |               |
| <p><b>1. Is the web resource informed by published single studies?</b><br/> <i>Resource includes reference to original research such as published single studies from peer-reviewed sources, statistics, textbooks</i></p>                                                                                                                                                                                                                                                                      |                 |               |
| <p><b>2. Is the web resource informed by published randomized controlled trials (RCTs)?</b><br/> <i>Resource includes reference to RCTs in text or in a reference list</i></p>                                                                                                                                                                                                                                                                                                                  |                 |               |
| <p><b>3. Is the web resource informed by published systematic reviews/meta analyses?</b><br/> <i>Resource includes reference to a systematic review or meta analyses in the body of the resource or in a reference list</i></p>                                                                                                                                                                                                                                                                 |                 |               |
| <p><b>4. Is the web resource informed by best practice guidelines?</b><br/> <i>Resources includes reference to a best practice guideline in the body of the resource or in a reference list</i></p>                                                                                                                                                                                                                                                                                             |                 |               |
| <p><b>5. Is the quality of the evidence reported?</b><br/> <i>Resource states the quality of evidence; or the website has a site-wide policy which states the quality of the evidence; or the resource is a summary of a larger report which states the quality of the evidence</i></p>                                                                                                                                                                                                         |                 |               |
| <p><b>6. Is the strength of recommendations provided?</b><br/> <i>The resource uses GRADE (or GRADE criteria) to inform any recommendations; or the website has a policy which states that GRADE criteria are used to inform any recommendations; or the resource is a summary of a larger report which uses GRADE criteria to inform any recommendations</i></p>                                                                                                                               |                 |               |
| <b>Total – Evidence-base</b>                                                                                                                                                                                                                                                                                                                                                                                                                                                                    |                 | <b>/6</b>     |
| <b>Transparency</b>                                                                                                                                                                                                                                                                                                                                                                                                                                                                             |                 |               |
| <p><b>7. Are peer-reviewed sources provided for each claim/recommendation?</b><br/> <i>Resource uses in-text citations from credible peer reviewed sources for each claim/recommendation</i></p>                                                                                                                                                                                                                                                                                                |                 |               |
| <p><b>8. Are the authors' or editors' name and affiliations disclosed?</b><br/> <i>The authors' names and affiliations are stated within the resources; or the website provides the name and affiliation of an authority who takes responsibility for the website content</i></p>                                                                                                                                                                                                               |                 |               |
| <p><b>9. Is the advertising clearly labelled (or is there no advertising)?</b></p>                                                                                                                                                                                                                                                                                                                                                                                                              |                 |               |
| <p><b>10. The web resource has been created or updated within the last 3 years?</b><br/> <i>The date when the search for evidence was conducted is within 3 years; or the date of the most recent reference in the web resource is within 3 years; or the posting or update date on the web resource is within 3 years (1pt).</i><br/> <i>If none of the above (or no date or references within the resource) the resource receives 0.5pt if the date of the website is within 3 years.</i></p> |                 |               |
| <p><b>11. Is there a feedback mechanism?</b><br/> <i>Resource includes a 'contact us' link or comments section</i></p>                                                                                                                                                                                                                                                                                                                                                                          |                 |               |
| <b>Total – Transparency</b>                                                                                                                                                                                                                                                                                                                                                                                                                                                                     |                 | <b>/5</b>     |

| Usability                                                                                                                                                                                                                                                                                                                                                                                                             |  |           |
|-----------------------------------------------------------------------------------------------------------------------------------------------------------------------------------------------------------------------------------------------------------------------------------------------------------------------------------------------------------------------------------------------------------------------|--|-----------|
| <p><b>12. Logical flow: Is the information easy to follow?</b><br/> <i>Resource layout is organized and easy to read; headings/sections are clear and informative</i></p>                                                                                                                                                                                                                                             |  |           |
| <p><b>13. Accessibility: Does the web resource offer options to access the information?</b><br/> <i>Resource includes text re-size options or screen reader for text content; or resource includes subtitles or a transcription for non-text content</i></p>                                                                                                                                                          |  |           |
| <b>Total - Usability</b>                                                                                                                                                                                                                                                                                                                                                                                              |  | <b>/2</b> |
| <b>Web Resource Rating Tool score calculation</b>                                                                                                                                                                                                                                                                                                                                                                     |  |           |
| <b>Step 1 - Evidence-base criteria</b> [total score for criteria 1 - 6] ÷ 6 x 75                                                                                                                                                                                                                                                                                                                                      |  | /75       |
| <b>Step 2 - Transparency &amp; Usability criteria</b> [total score for criteria 7 - 13] ÷ 7 x 25                                                                                                                                                                                                                                                                                                                      |  | /25       |
| <b>TOTAL SCORE</b><br>Total Step 1 + Total Step 2                                                                                                                                                                                                                                                                                                                                                                     |  | /100      |
| <p>* Note Criteria 10 includes one exception to this individual criteria rating score<br/> <i>The total web resource rating score is weighted to value content that demonstrates the use of scientific research evidence: the six criteria assessing evidence base comprise 75% of the total score; the seven criteria assessing transparency and usability are combined and comprise 25% of the total score.</i></p> |  |           |
